# Supplementary material for: Figure-of-eight bandage versus arm sling for treating middle-third clavicle fractures in adults: study protocol for a randomised controlled trial
Source: PubMed Central journal article supplement (PMC4855803; doi:10.1186/s13063-016-1355-8), 2016-05-04
Supplement: 13063_2016_1355_MOESM3_ESM.pdf [file 13063_2016_1355_MOESM3_ESM.pdf]

**Additional file 3 Data collection form**

**Ficha de coleta de dados dos pacientes** (*Pre-piloted data extraction form*)

**Título do Projeto:** *Imobilização em oito versus tipoia simples para o tratamento das fraturas do terço médio da clavícula: um ensaio clínico randomizado.*

**Title:** *Figure of eight bandage versus arm sling for treating middle third clavicle fractures in adults: a randomised controlled trial.*

**Coordenador do Projeto** (*Coordinator*): Mario Lenza

**Médico Responsável** (*Physician guarantor*): Luiz Fabiano Presente Taniguchi

Número do paciente no estudo (*Number of patient in the study*): \_\_\_\_\_.

Data do início (*Date*): \_\_ / \_\_ / \_\_\_\_.

Nome (*Name*): \_\_\_\_\_.

Registro hospitalar (*Medical records*): \_\_\_\_\_.

Telefones (*Phones*): \_\_\_\_\_; \_\_\_\_\_; \_\_\_\_\_.

Endereço (*Address*): \_\_\_\_\_.

\_\_\_\_\_.

\_\_\_\_\_.

Email: \_\_\_\_\_.



Deslocamento máximo (*Maximum displacement*): \_\_\_\_\_ mm

Nível de participação em esportes (*Level of participation in sports*):

Competitivo (*Competitive*)

Social (*Social*)

Nenhum (*None*)

Tipo de trabalho (*Employment status*):

Manual/Braçal (*Manual labor*)

Sedentário (*Sedentary*)

Desempregado (*Unemployed*)

Classificação da lesão (*Injury classification*):

- Por favor, assinale a classificação mais apropriada (*Please check the most appropriated fracture*):

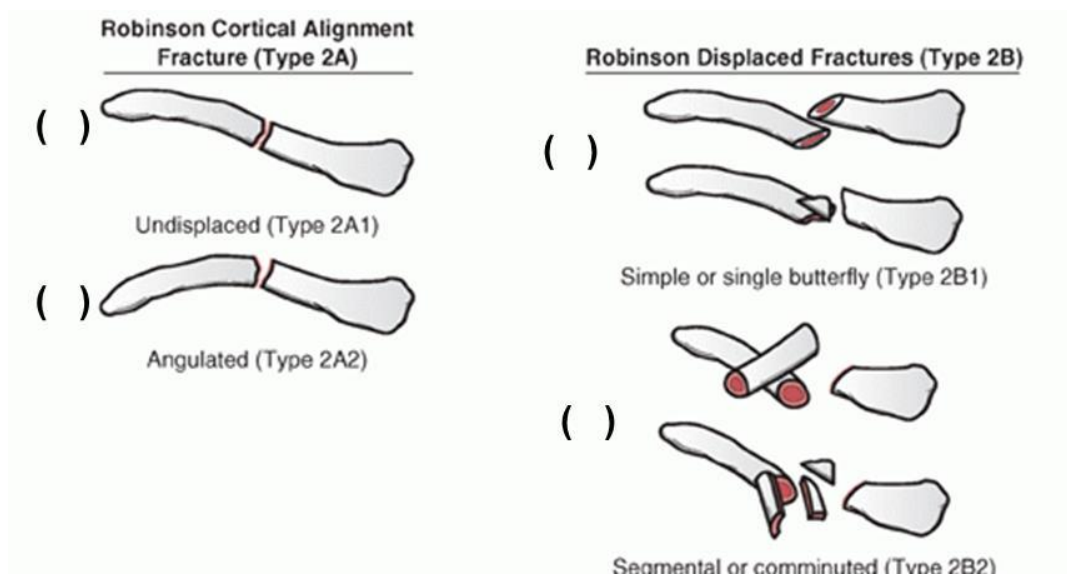

## Desfecho – (outcome):

### DASH<sup>27,28</sup>:

#### Instruções

Esse questionário é sobre seus sintomas, assim como suas habilidades para fazer certas atividades.

Por favor, responda a todas as questões baseando-se na sua condição na semana passada.

Se você não teve a oportunidade de fazer uma das atividades na semana passada, por favor, tente estimar qual resposta seria a mais correta.

Não importa qual mão ou braço você usa para fazer a atividade; por favor, responda baseando-se na sua habilidade independentemente da forma como você faz a tarefa.

Meça a sua habilidade em fazer as seguintes atividades na semana passada circulando a resposta apropriada abaixo:

|                                                                                                                                                     | Não houve dificuldade | Houve pouca dificuldade | Houve dificuldade média   | Houve muita dificuldade | Não conseguiu fazer                  |
|-----------------------------------------------------------------------------------------------------------------------------------------------------|-----------------------|-------------------------|---------------------------|-------------------------|--------------------------------------|
| 1. Abrir um vidro novo ou com a tampa muito apertada                                                                                                | 1                     | 2                       | 3                         | 4                       | 5                                    |
| 2. Escrever                                                                                                                                         | 1                     | 2                       | 3                         | 4                       | 5                                    |
| 3. Virar uma chave                                                                                                                                  | 1                     | 2                       | 3                         | 4                       | 5                                    |
| 4. Preparar uma refeição                                                                                                                            | 1                     | 2                       | 3                         | 4                       | 5                                    |
| 5. Abrir uma porta pesada                                                                                                                           | 1                     | 2                       | 3                         | 4                       | 5                                    |
| 6. Colocar algo em uma prateleira acima de sua cabeça                                                                                               | 1                     | 2                       | 3                         | 4                       | 5                                    |
| 7. Fazer tarefas domésticas pesadas (por exemplo: lavar paredes, lavar o chão)                                                                      | 1                     | 2                       | 3                         | 4                       | 5                                    |
| 8. Fazer trabalho de jardinagem                                                                                                                     | 1                     | 2                       | 3                         | 4                       | 5                                    |
| 9. Arrumar a cama                                                                                                                                   | 1                     | 2                       | 3                         | 4                       | 5                                    |
| 10. Carregar uma sacola ou uma maleta                                                                                                               | 1                     | 2                       | 3                         | 4                       | 5                                    |
| 11. Carregar um objeto pesado (mais de 5 kg)                                                                                                        | 1                     | 2                       | 3                         | 4                       | 5                                    |
| 12. Trocar uma lâmpada acima da cabeça                                                                                                              | 1                     | 2                       | 3                         | 4                       | 5                                    |
| 13. Lavar ou secar o cabelo                                                                                                                         | 1                     | 2                       | 3                         | 4                       | 5                                    |
| 14. Lavar suas costas                                                                                                                               | 1                     | 2                       | 3                         | 4                       | 5                                    |
| 15. Vestir uma blusa fechada                                                                                                                        | 1                     | 2                       | 3                         | 4                       | 5                                    |
| 16. Usar uma faca para cortar alimentos                                                                                                             | 1                     | 2                       | 3                         | 4                       | 5                                    |
| 17. Atividades recreativas que exigem pouco esforço (por exemplo: jogar cartas, tricotar)                                                           | 1                     | 2                       | 3                         | 4                       | 5                                    |
| 18. Atividades recreativas que exigem força ou impacto nos braços, ombros ou mãos (por exemplo: jogar vôlei, martelar)                              | 1                     | 2                       | 3                         | 4                       | 5                                    |
| 19. Atividades recreativas nas quais você move seu braço livremente (como pescar, jogar peteca)                                                     | 1                     | 2                       | 3                         | 4                       | 5                                    |
| 20. Transportar-se de um lugar a outro (ir de um lugar a outro)                                                                                     | 1                     | 2                       | 3                         | 4                       | 5                                    |
| 21. Atividades sexuais                                                                                                                              | 1                     | 2                       | 3                         | 4                       | 5                                    |
|                                                                                                                                                     | Não afetou            | Afetou pouco            | Afetou medianamente       | Afetou muito            | Afetou extremamente                  |
| 22. Na semana passada, em que ponto o seu problema com braço, ombro ou mão afetou suas atividades normais com família, amigos, vizinhos ou colegas? | 1                     | 2                       | 3                         | 4                       | 5                                    |
|                                                                                                                                                     | Não limitou           | Limitou pouco           | Limitou medianamente      | Limitou muito           | Não conseguiu fazer                  |
| 23. Durante a semana passada, o seu trabalho ou atividades diárias normais foram limitadas devido ao seu problema com braço, ombro ou mão?          | 1                     | 2                       | 3                         | 4                       | 5                                    |
| Meça a gravidade dos seguintes sintomas na semana passada:                                                                                          | Nenhuma               | Pouca                   | Mediana                   | Muita                   | Extrema                              |
| 24. Dor no braço, ombro ou mão                                                                                                                      | 1                     | 2                       | 3                         | 4                       | 5                                    |
| 25. Dor no braço, ombro ou mão quando você fazia atividades específicas                                                                             | 1                     | 2                       | 3                         | 4                       | 5                                    |
| 26. Desconforto na pele (alfinetadas) no braço, ombro ou mão                                                                                        | 1                     | 2                       | 3                         | 4                       | 5                                    |
| 27. Fraqueza no braço, ombro ou mão                                                                                                                 | 1                     | 2                       | 3                         | 4                       | 5                                    |
| 28. Dificuldade em mover braço, ombro ou mão                                                                                                        | 1                     | 2                       | 3                         | 4                       | 5                                    |
|                                                                                                                                                     | Não houve dificuldade | Pouca dificuldade       | Média dificuldade         | Muita dificuldade       | Tão difícil que você não pôde dormir |
| 29. Durante a semana passada, qual a dificuldade que você teve para dormir por causa da dor no seu braço, ombro ou mão?                             | 1                     | 2                       | 3                         | 4                       | 5                                    |
|                                                                                                                                                     | Discordo totalmente   | Discordo                | Não concordo nem discordo | Concordo                | Concordo totalmente                  |
| 30. Eu me sinto menos capaz, menos confiante e menos útil por causa do meu problema com braço, ombro ou mão                                         | 1                     | 2                       | 3                         | 4                       | 5                                    |

Total (Total): \_\_\_\_\_

Desfecho (outcome):

**Modified University of California at Los Angeles (modified - UCLA)<sup>29-31</sup>**

**DOR**

|                                                                                                                       |    |
|-----------------------------------------------------------------------------------------------------------------------|----|
| 1) Presente todo o tempo e insuportável; faz uso de medicação regularmente                                            | 1  |
| 2) Presente todo o tempo, mas suportável; faz uso de medicação de vez em quando                                       | 2  |
| 3) Nenhuma ou pouca dor quando o braço está parado, ocorre durante trabalhos leves; faz uso de medicação regularmente | 4  |
| 4) Ocorre apenas durante trabalhos pesados ou durante trabalhos específicos; faz uso de medicação de vez em quando    | 6  |
| 5) Dor leve e ocorre de vez em quando                                                                                 | 8  |
| 6) Nenhuma                                                                                                            | 10 |

**FUNÇÃO**

|                                                                                                                                              |    |
|----------------------------------------------------------------------------------------------------------------------------------------------|----|
| 1) Incapaz de usar o braço                                                                                                                   | 1  |
| 2) Capaz apenas de realizar atividades leves                                                                                                 | 2  |
| 3) Capaz de realizar trabalhos domésticos leves ou a maioria dos trabalhos do dia-a-dia                                                      | 4  |
| 4) Capaz de realizar a maioria dos trabalhos domésticos, inclusive fazer compras, dirigir, pentear-se, vestir-se, despir-se e fechar o sutiã | 6  |
| 5) Apresenta pouca dificuldade, capaz de realizar movimentos acima da altura do ombro                                                        | 8  |
| 6) Atividades normais                                                                                                                        | 10 |

**INSTRUÇÕES PARA GONIOMETRIA**

O paciente deve se posicionar sentado com o membro ao lado do corpo e posição neutra. O examinador deve instruí-lo a elevar o braço o máximo possível sem compensações.

O goniômetro será posicionado com braço proximal na linha média axilar do tórax e braço distal na linha médio lateral do úmero, sendo o eixo colocado próximo ao acrômio.

**FLEXÃO ANTERIOR ATIVA**

|                       |   |
|-----------------------|---|
| 1) 150 graus ou mais  | 5 |
| 2) 120 a 150 graus    | 4 |
| 3) 90 a 120 graus     | 3 |
| 4) 45 a 90 graus      | 2 |
| 5) 30 a 45 graus      | 1 |
| 6) Menos que 30 graus | 0 |

**INSTRUÇÕES PARA O TESTE DE FORÇA MANUAL**

O paciente deve se posicionar sentado com o membro ao lado do corpo e antebraço pronado, a seguir deve elevar o membro a 90 graus. O examinador deves instruí-lo a manter esta posição contra resistência que será aplicada na porção distal do úmero (acima do cotovelo).

**FORÇA DE FLEXÃO ANTERIOR ATIVA  
(TESTE DE FORÇA MANUAL)**

|                                   |   |
|-----------------------------------|---|
| 1) Grau 5 (normal)                | 5 |
| 2) Grau 4 (boa)                   | 4 |
| 3) Grau 3 (regular)               | 3 |
| 4) Grau 2 (fraco)                 | 2 |
| 5) Grau 1 (contração muscular)    | 1 |
| 6) Grau 0 (ausência de contração) | 0 |

**SATISFAÇÃO DO PACIENTE**

|                        |   |
|------------------------|---|
| 1) Satisfeito e melhor | 5 |
| 2) Insatisfeito e pior | 0 |

Total (Total): \_\_\_\_\_

Desfecho (outcome):

**EVA (VAS)**<sup>32-35</sup>

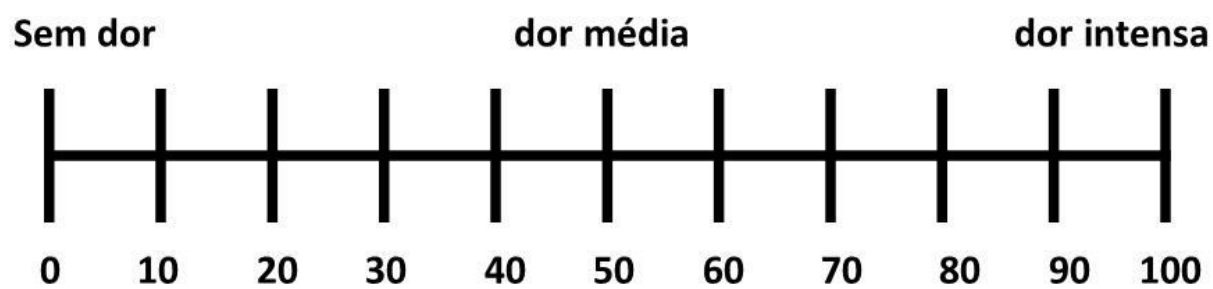

Desfecho (outcome):

**Falha do tratamento (Treatment failure):** ( ) sim (*yes*) ( ) não (*no*)

**Eventos adversos mensurados por:**

**Resultado cosmético (Cosmetic result):** ( ) sim (*yes*) ( ) não (*no*)

**Pseudartrose assintomática (Asymptomatic non-union):** ( ) sim (*yes*) ( ) não (*no*)

**Arco de movimento (Range of motion):**

**Elevação (Elevation):**

lado com lesão (*injury side*): \_\_\_\_ lado sem lesão (*non-injury side*): \_\_\_\_

**Rotação lateral (Lateral rotation):**

lado com lesão (*injury side*): \_\_\_\_ lado sem lesão (*non-injury side*): \_\_\_\_

**Rotação medial (Medial rotation):**

lado com lesão (*injury side*): \_\_\_\_ lado sem lesão (*non-injury side*): \_\_\_\_

**Retorno às atividades (Returning to activities):** ( ) sim (*yes*) ( ) não (*no*)

**Se sim, quanto tempo após a fratura (if yes, for how long after fracture):** \_\_\_\_\_.
