# Supplementary material for: Figure-of-eight bandage versus arm sling for treating middle-third clavicle fractures in adults: study protocol for a randomised controlled trial
Source: Trials. 2016 May 4;17:229. doi: 10.1186/s13063-016-1355-8 (PMC4855803; doi:10.1186/s13063-016-1355-8)
Supplement: Additional file 1: — Informed consent (Portuguese). (PDF 123 kb) [file 13063_2016_1355_MOESM1_ESM.pdf]

***Título do projeto:** Imobilização em oito versus tipoia simples para o tratamento das fraturas do terço médio da clavícula: um ensaio clínico randomizado.*

**Additional file 1 Informed Consent (Portuguese)**

**TERMO DE CONSENTIMENTO LIVRE E ESCLARECIDO**

***Título do projeto:** Imobilização em oito versus tipoia simples para o tratamento das fraturas do terço médio da clavícula: um ensaio clínico randomizado.*

Prezado Paciente,

Você foi convidado a participar da pesquisa intitulada “Imobilização em oito versus tipoia simples para o tratamento das fraturas do terço médio da clavícula: um ensaio clínico randomizado”. Essas informações serão fornecidas por meio de sua participação voluntária neste estudo, com o objetivo de avaliar a efetividade (benefícios e malefícios) das intervenções: imobilização em oito versus uso da tipoia simples para o tratamento de fraturas de clavícula do terço médio da clavícula.

A motivação da realização deste estudo se deve ao fato de encontrarmos na literatura atual dúvidas de qual seja o melhor tratamento conservador para as fraturas da clavícula. Acreditarmos que o tratamento das fraturas da clavícula com o uso de tipoia simples apresente os mesmos resultados funcionais e de qualidade de vida que o tratamento com a imobilização em oito.

*Procedimentos a serem utilizados:*

O número de participantes estimado é de 110 indivíduos, divididos em dois grupos, 55 para o grupo de imobilização com tipoia simples e 55 para o grupo de imobilização em oito. A seleção será feita de forma randomizada, isto é, não saberemos onde cada indivíduo será incluído.

Os dois grupos de pacientes receberão os mesmos cuidados e os mesmos seguimentos. As avaliações serão realizadas por meio de exames clínicos (realizado por um médico) e exames radiográficos em 1, 2 e 4 semanas e em 3, 6 e 12 meses após a intervenção. O programa de reabilitação após as intervenções de tratamento será idêntico em cada um dos grupos comparados. Depois de 4 semanas de tratamento, um fisioterapeuta instruirá os participantes a realizar alguns exercícios simples de alongamento em casa.

No término do estudo será verificado se houve melhora nas avaliações funcionais, de qualidade de vida e radiográficas por meio de questionários de simples preenchimento e radiografias nas posições ântero-

***Título do projeto: Imobilização em oito versus tipoia simples para o tratamento das fraturas do terço médio da clavícula: um ensaio clínico randomizado.***

posterior (AP) e AP com inclinação cranial de 20° das suas clavículas. Não há risco ou desconforto para os pacientes que estarão expostos à radiação usada para avaliação de fraturas da clavícula.

Não haverá benefício para o participante. Trata-se de um estudo experimental, testando a hipótese de que tratamento das fraturas da clavícula com o uso de tipoia simples apresenta os mesmos resultados funcionais e de qualidade de vida quanto o tratamento com a imobilização em oito. Somente no final do estudo poderemos concluir a presença de algum benefício entre estes dois tipos de tratamento (tipoia e imobilização em oito).

Em qualquer etapa do estudo, você terá acesso aos profissionais responsáveis pela pesquisa para esclarecimento de eventuais dúvidas. O coordenador do projeto é o Dr. Mário Lenza e o principal responsável pelo estudo é o Dr. Luiz Fabiano Presente Taniguchi, que podem ser encontrados: Dr. Mario Lenza – endereço Av. Albert Einstein, 627 – bloco A1 – 3º andar – Programa Locomotor, Morumbi, São Paulo – CEP 05652-900: Tel: (11) 2151.1444; e-mail: [mario.lenza@einstein.br](mailto:mario.lenza@einstein.br); e Dr. Luiz Fabiano Presente Taniguchi – endereço Hospital Municipal Dr. Moysés Deutsch - M'Boi Mirim Estrada do M'Boi Mirim, 5203 – Ortopedia, Jd. Ângela, São Paulo – CEP 04948-970: Tel: (11) 5832-2500; e-mail: [Luiz.Taniguchi@hmbm.org.br](mailto:Luiz.Taniguchi@hmbm.org.br).

Se você tiver qualquer dúvida ética em relação à pesquisa, entre em contato com o Comitê de ética em Pesquisa da Secretaria Municipal de Saúde de São Paulo, Rua General Jardim nº36, 1º Andar, Fone 3397-2464, e-mail: [smscep@gmail.com](mailto:smscep@gmail.com), ou com o Comitê de Ética em Pesquisa do Hospital Israelita Albert Einstein Av. Albert Einstein 627/701, fone 2151-0291, e-mail: [cep@einstein.br](mailto:cep@einstein.br).

É garantida a liberdade da retirada de consentimento a qualquer momento e deixar de participar do estudo, sem qualquer prejuízo à continuidade de seu tratamento na Instituição.

As informações obtidas serão analisadas em conjunto com outros pacientes voluntários, não sendo divulgada a identificação de nenhum paciente. Você tem o direito de ser mantido atualizado sobre os resultados parciais das pesquisas e de quaisquer resultados que sejam do conhecimento dos pesquisadores. Não há despesas pessoais para o participante em qualquer fase do estudo, incluindo exames e consultas. Também não há compensação financeira relacionada à sua participação. Se existir qualquer despesa adicional, ela será absorvida pelo orçamento da pesquisa.

***Título do projeto: Imobilização em oito versus tipoia simples para o tratamento das fraturas do terço médio da clavícula: um ensaio clínico randomizado.***

Na improvável ocorrência de algum dano pessoal, diretamente causado pelos procedimentos ou tratamentos propostos neste estudo (nexo causal comprovado), o participante terá o direito a tratamento médico na instituição, bem como às indenizações legalmente estabelecidas.

O pesquisador tem o compromisso de utilizar os dados e materiais coletado durante o estudo, somente para esta pesquisa.

Acredito ter sido suficientemente informado a respeito das informações que li ou que foram lidas para mim e assinando este documento concordo em participar deste estudo.

\_\_\_\_\_  
Assinatura do paciente/representante legal

\_\_\_\_\_  
Nome completo do paciente/representante legal  
Data \_\_/\_\_/\_\_

\_\_\_\_\_  
Assinatura da testemunha\*

\_\_\_\_\_  
Nome completo da testemunha  
Data \_\_/\_\_/\_\_

\*para casos de pacientes menores de 18 anos, analfabetos, semi-analfabetos ou portadores de deficiência auditiva ou visual.

(Somente para o responsável do projeto)

Declaro que obtive de forma apropriada e voluntária o Consentimento Livre e Esclarecido deste paciente ou representante legal para a participação neste estudo.

\_\_\_\_\_  
Assinatura do responsável pelo estudo

\_\_\_\_\_  
Nome completo do responsável pelo estudo  
Data \_\_/\_\_/\_\_
